# Supplementary material for: SOX11 and SOX4 drive the reactivation of an embryonic gene program during murine wound repair
Source: PubMed Central journal article supplement (PMC6731344; doi:10.1038/s41467-019-11880-9), 2019-09-06
Supplement: 41467_2019_11880_MOESM1_ESM.pdf [file 41467_2019_11880_MOESM1_ESM.pdf]

**SOX11 and SOX4 drive the reactivation of an embryonic gene  
program during murine wound repair**

Miao et al.

**Supplementary Information**

# Supplementary Figure 1

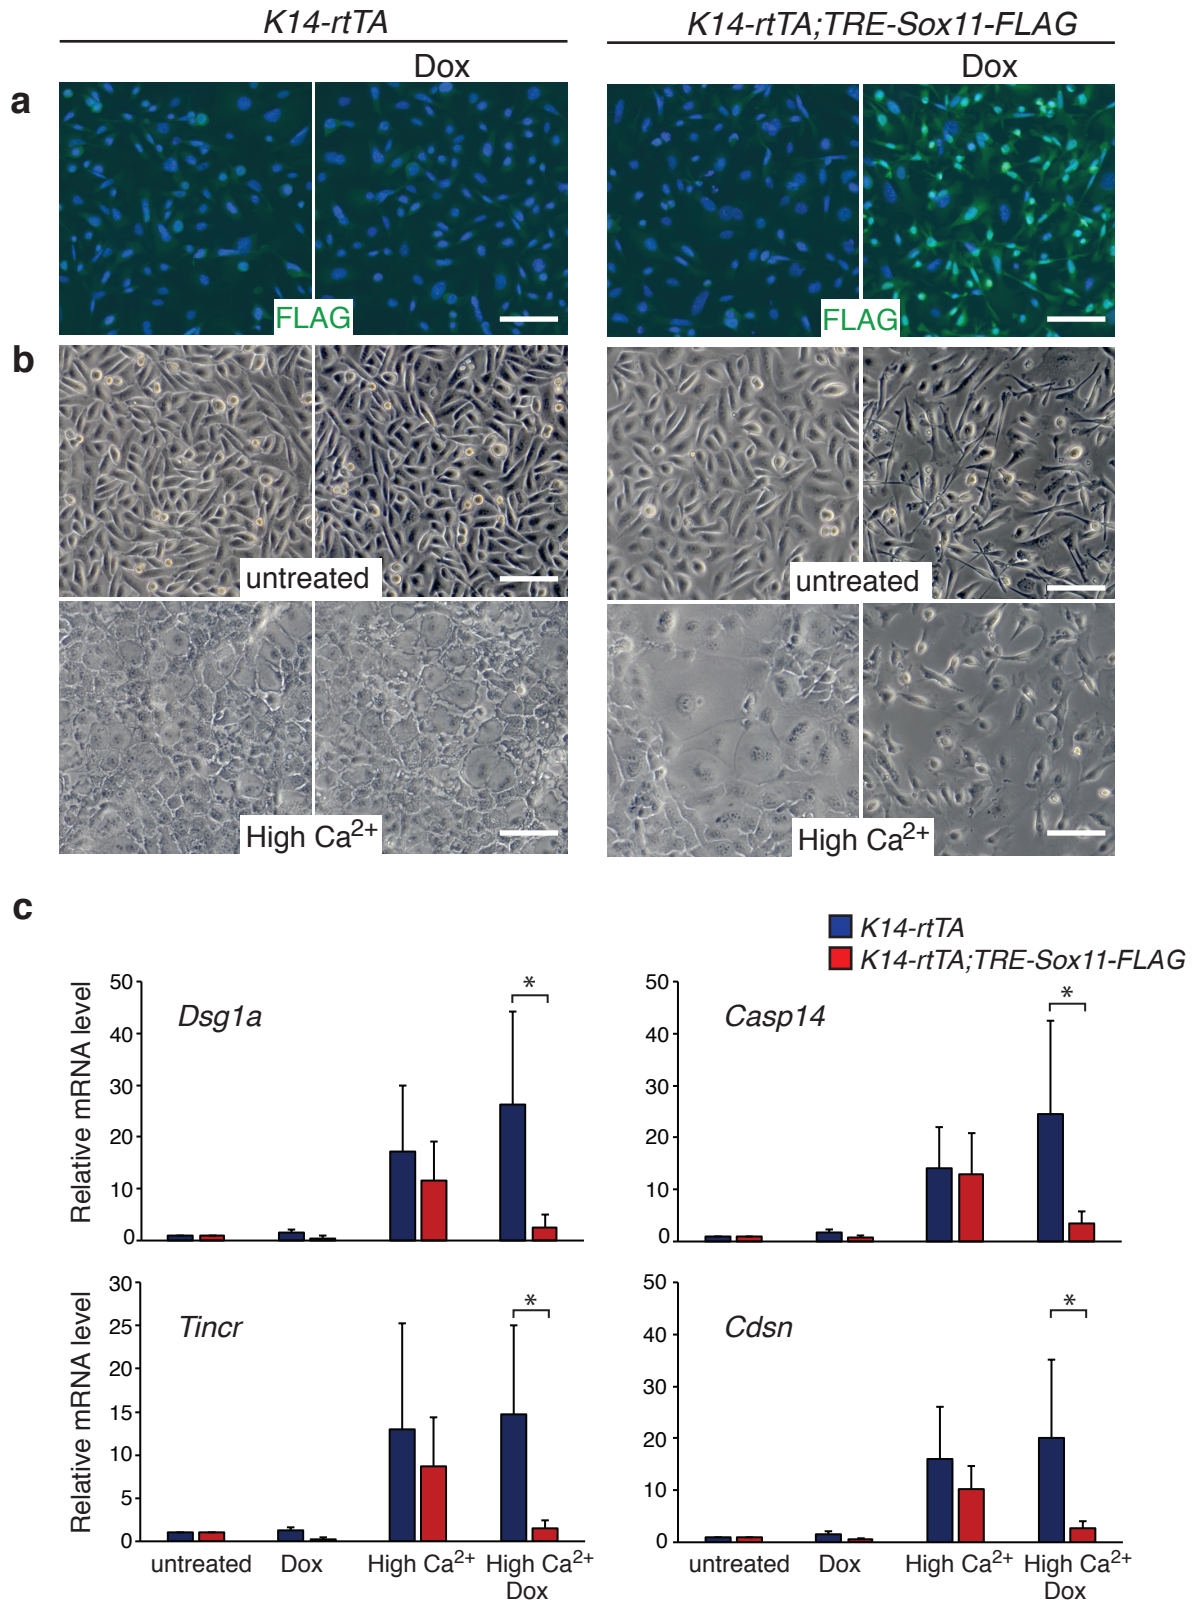

**Supplementary Figure 1. SOX11 overexpression inhibits keratinocyte differentiation.** (a) Immunofluorescence analysis of FLAG-tagged SOX11 induction in *K14-rtTA;TRE-Sox11-FLAG* keratinocytes *in vitro*. Primary keratinocytes from *K14-rtTA* (control) or *K14-rtTA;TRE-Sox11-FLAG* newborn skins were cultured with or without Dox (1 µg/ml) for 24 h prior to immunostaining for FLAG tag. (b) Effect of SOX11 expression on calcium-induced morphological changes of keratinocytes *in vitro*. Primary keratinocytes from *K14-rtTA* (control) or *K14-rtTA;TRE-Sox11-FLAG* newborn skins were cultured with or without Dox (1 µg/ml) 24 h prior to the addition of 1.5-mM calcium or vehicle control for an additional 24 h. (c) qRT-PCR analysis of epidermal differentiation gene expression in *K14-rtTA* (control) or *K14-rtTA;TRE- Sox11-FLAG* keratinocytes. Cells with or without Dox treatment were cultured with or without calcium (1.5 mM) for 24 h. The gene expression level in the *K14-rtTA* cells without any treatment was set as 1. Data are the mean ± SD. *n* = 5 biologically independent samples. \**p*<0.05 (Student's one-tailed *t*-test). Scale bar, 100 µm. Images in panels **a** and **b** are representative of images from 2 and 3 experiments, respectively. The selected images reflect the images detected uniformly across the plate of each sample. Source data for panel **c** are provided as a Source Data file.

## Supplementary Figure 2

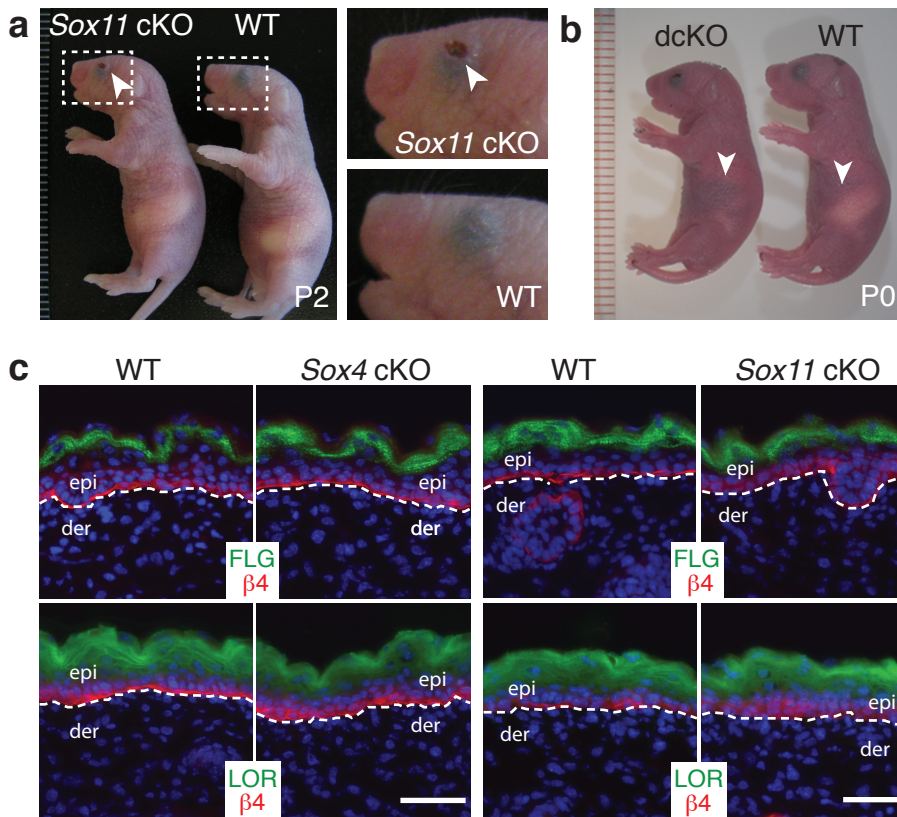

**Supplementary Figure 2. Effects of deficiency of *Sox11* and *Sox4*.** (a) Images of WT and *Sox11* cKO neonates. Note the open eyes in *Sox11* cKO pups (arrow-headed). (b) Images of WT and newborns deficient of both *Sox11* and *Sox4*. Note the lack of milk spot (arrow-headed) in the *dcKO*. (c) Immunofluorescence analysis of epidermal differentiation markers in embryos lacking either *Sox11* or *Sox4* at E16.5. White dashed lines demarcate the epidermal and dermal border. Scale bar, 50  $\mu$ m. Neonates in the images in panels a and b are representative of those from all (>20) the litters observed with 8-12 animals each litter. Images in panel c are representative of images from 2 experiments on 2 different pairs of animals. The selected images reflect the images detected uniformly across the skin section of each sample.

### Supplementary Figure 3

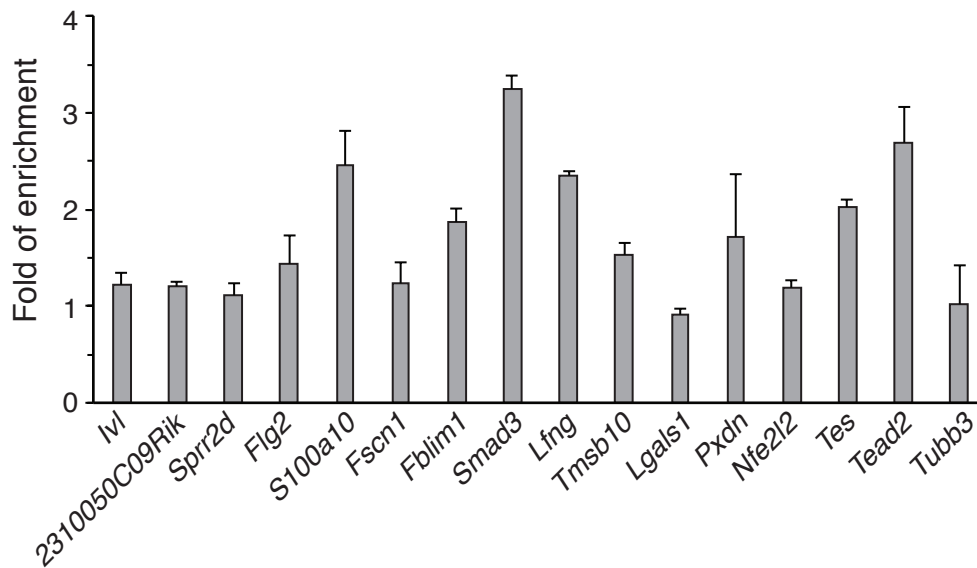

**Supplementary Figure 3. ChIP-qPCR analysis of epidermal cells over-expressing SOX11.** ChIP was performed with anti-FLAG antibody on ~10 million pooled epidermal basal cells isolated from *K14rtTA;TRE-Sox11-FLAG* 4-day old pups 24 h after Dox treatment. qPCR analysis was done using primers spanning regions containing SOX4/11- binding motif or regions without the conserved binding sites (negative control) of selected targets identified by ChIP-seq. The graph shows the relative amount of the region containing SOX11/4 binding motif bound to SOX11-FLAG relative to the negative control region. Data are mean  $\pm$  SD.  $n = 2$  biologically independent samples. Source data are provided as a Source Data file.

# Supplementary Figure 4

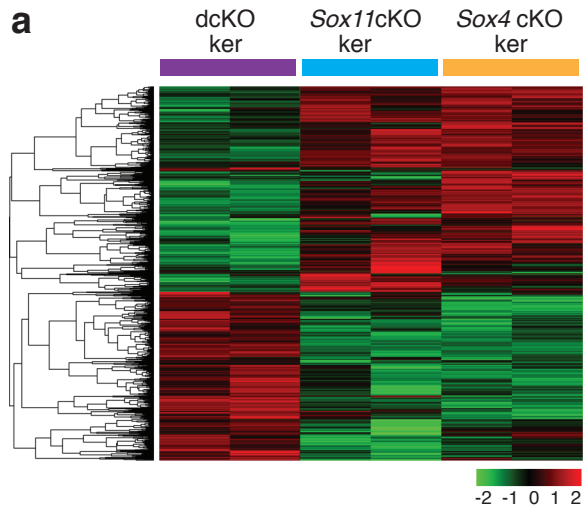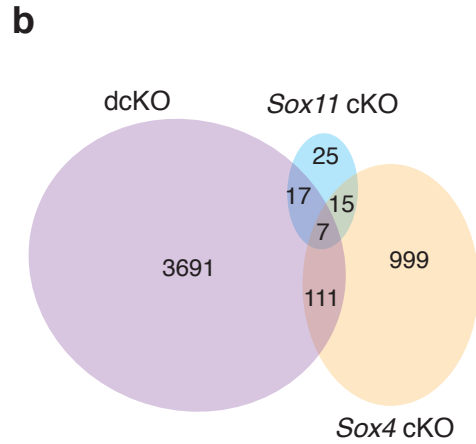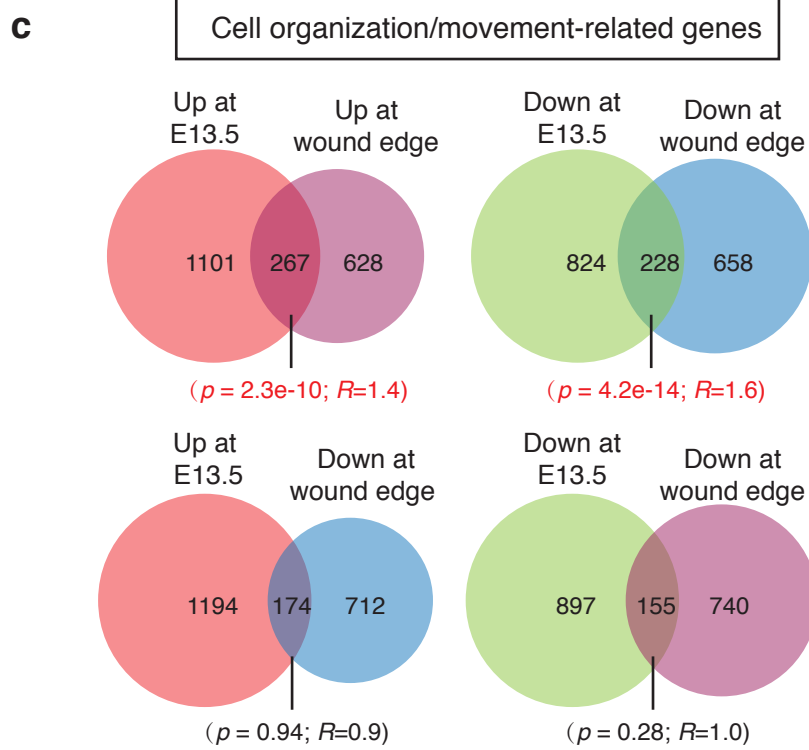

**Supplementary Figure 4. Transcriptomic profiling of primary keratinocytes deficient of both Sox11 and Sox4 or of either gene alone.** (a) Primary keratinocytes cultured from newborn littermates of indicated genotypes were subjected to the two-color microarray analysis with 2 biological replicates per genotype. Heat map shows clustering of genes with significant differential expression ( $\log_2$ -fold change  $>1.5$  and  $FDR < 0.05$ ) in dcKO, Sox11 cKO or Sox4 cKO primary keratinocytes relative to their wild-type controls. (b) Venn diagram showing the overlap of the probesets significantly changed in dcKO, Sox11 cKO or Sox4 cKO keratinocytes. (c) Venn diagrams comparing cell organization and cell migration related genes that are differentially expressed in epidermal cells at E13.5 versus P4 and at wound edge versus unwounded<sup>1</sup>. Statistical significance (highlighted in red) is found in the overlap between genes upregulated at E13.5 and at the wound edge ( $p = 2.3e-10$ ,  $R > 1$ ) and between genes downregulated at E13.5 and at the wound edge ( $p = 4.2e-14$ ,  $R > 1$ ). Source data for the lists of genes are provided as a Source Data file.

# Supplementary Figure 5

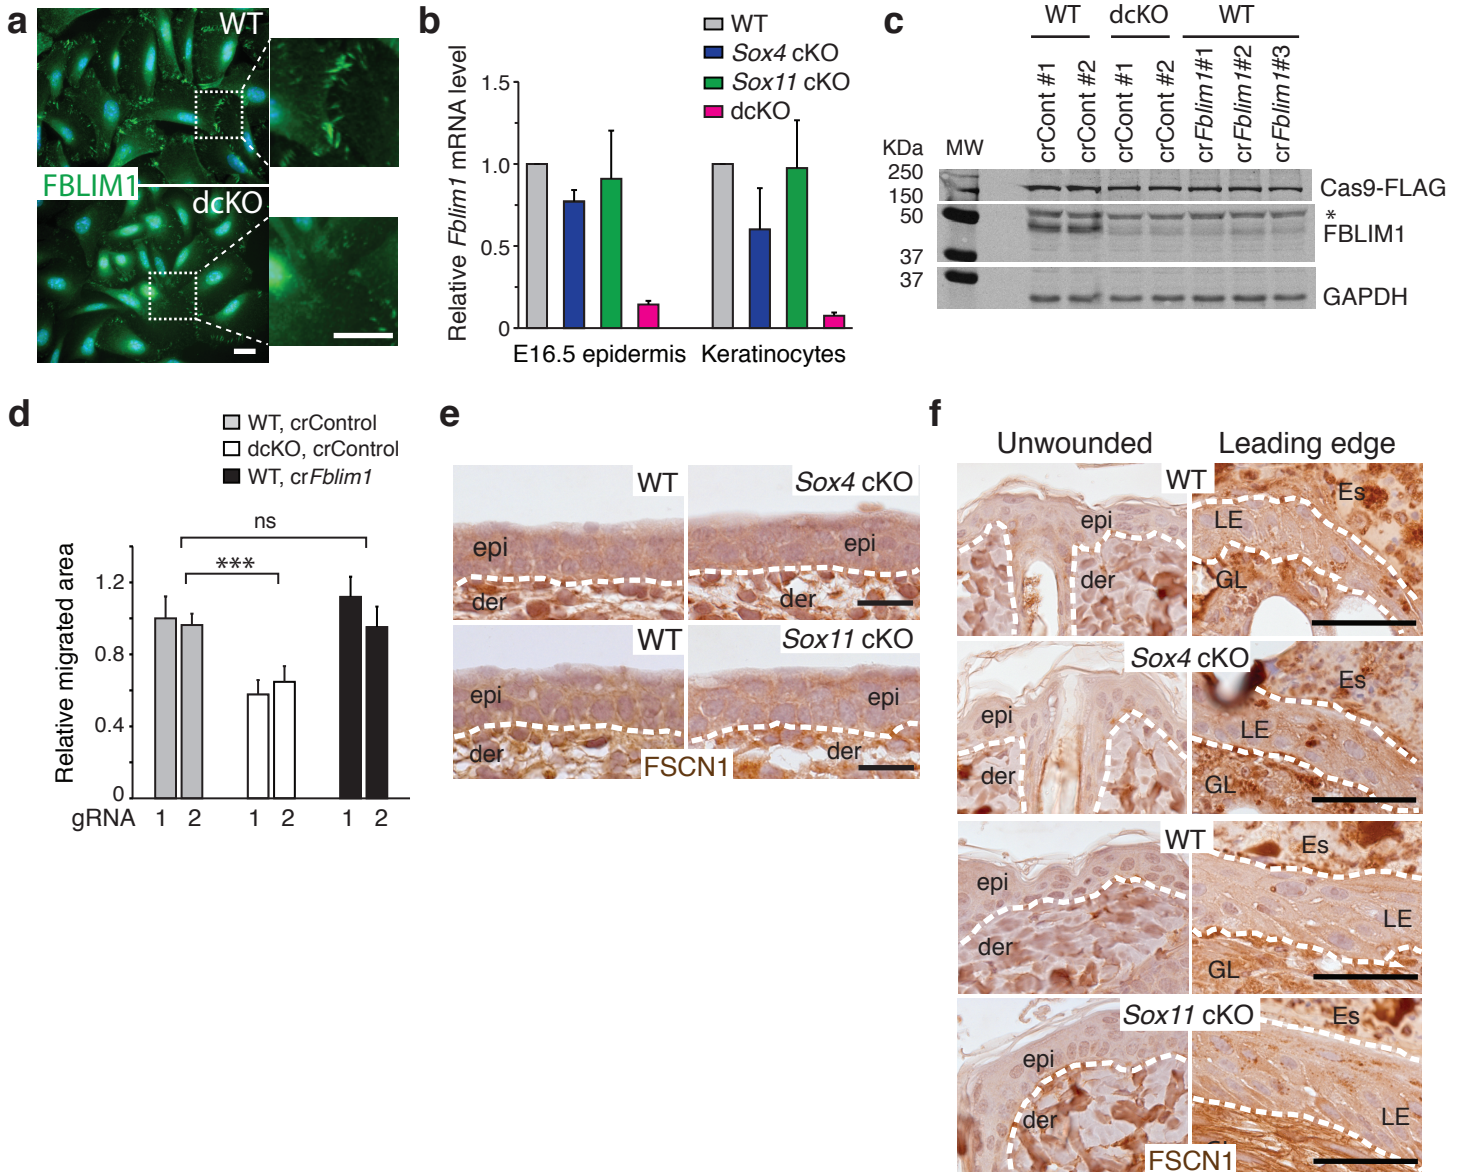



**Supplementary Figure 5. Regulation of *Fblim1* and *Fscn1* by SOX11 and SOX4.** (a) Immunofluorescence analysis of FBLIM1 expression in WT and dcKO primary keratinocytes. Images are representative of images from 2 independent experiments. (b) RT-qPCR analysis of *Fblim1* expression in isolated E16.5 epidermis and primary keratinocytes of specified genotypes. Data are the mean  $\pm$  SD.  $n = 2$  (*Sox11* cKO-control pairs), or 3 (*Sox4* cKO-control pairs, and dcKO-control pairs) biologically independent samples. (c) Western blot analysis of CRISPR/Cas9-mediated *Fblim1* knockout. WT or dcKO primary keratinocytes were transduced with lentiviral vectors expressing FLAG tagged CRISPR/Cas9 and control gRNAs or gRNAs targeting *Fblim1*. \*, non-specific bands. The Western blot image is available in Supplementary Figure 6. (d) Effect of ablation of *Fblim1* on migration. Graph quantifying relative areas the cells migrated normalized over the controls (WT cells expressing control gRNAs). Data are the mean  $\pm$  SD.  $n = 3$  independent experiments, with 16-18 fields quantified per replicate. \*\*\* $p < 0.001$ , ns, not significant (Student's two-tailed *t*-test). (e) Immunochemical analysis of FSCN1 expression in E14.5 skin deficient of either *Sox11* or *Sox4*. (f) Immunohistochemical analysis of FSCN1 expression at wound edge of *Sox11*- or *Sox4*-ablated and control skins 5 days post wounding. Epi, epidermis; Der, dermis; Es, eschar; LE, leading edge; GL, granulation layer. Scale bars, 20  $\mu\text{m}$  (a, e), 50  $\mu\text{m}$  (f). Images in panels e and f are representative of images from 3 experiments, reflecting the images detected through the plate of each sample (a), or the entire skin section of each sample (e and f). Source data for panel b-d are provided as a Source Data file.

## Supplementary Figure 6

**a** Fig. 6a

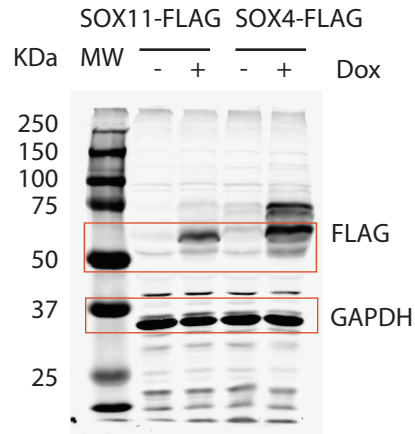

**b** Supplementary Figure 5c

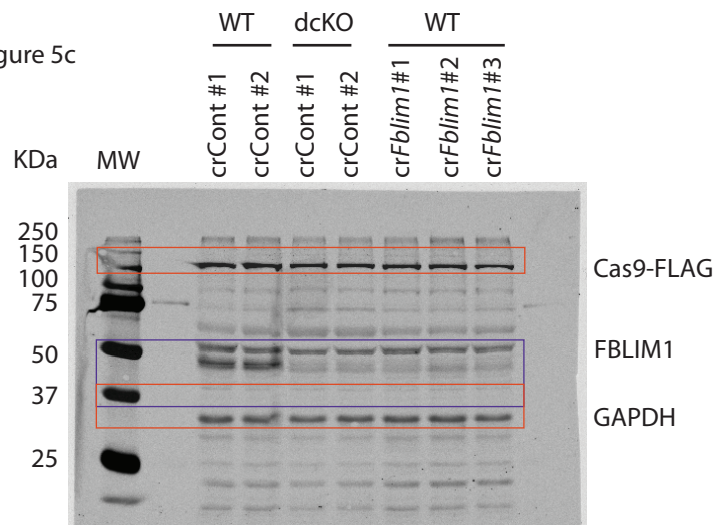

**c** Fig. 9i

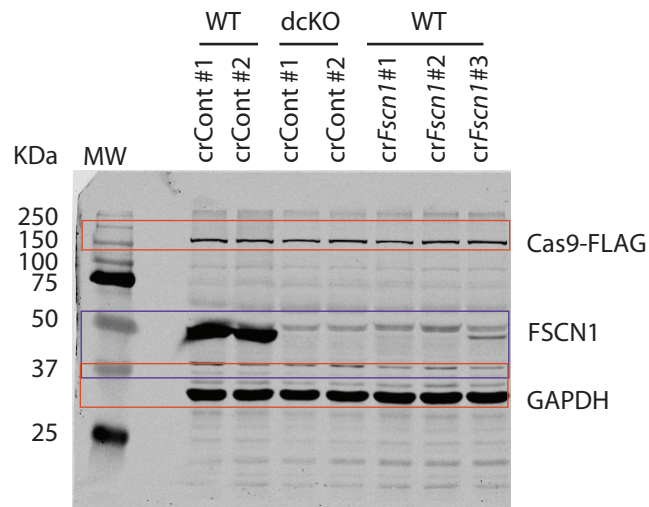

**Supplementary Figure 6. Unprocessed images of Western blots.** Uncropped Western blot images of scanned immunoblots shown in **Fig. 6 (a)**, **Supplementary Figure 5 (b)**, and **Fig. 9 (c)**.

## Supplementary Table 1

| Gene ID | Gene Symbol    | E13.5 vs P4 | WdEpi* |
|---------|----------------|-------------|--------|
| 11568   | <i>Aebp1</i>   | 3.34        | 3.36   |
| 100182  | <i>Akna</i>    | 3.24        | 3.87   |
| 11792   | <i>Apex1</i>   | 1.53        | 1.52   |
| 70350   | <i>Basp1</i>   | 4.85        | 11.42  |
| 53314   | <i>Batf</i>    | 2.81        | 7.97   |
| 381319  | <i>Batf3</i>   | 2.21        | 7.48   |
| 320705  | <i>Bend6</i>   | 4.40        | 5.33   |
| 66653   | <i>Brf2</i>    | 1.51        | 1.52   |
| 12398   | <i>Cbfa2t3</i> | 1.92        | 7.83   |
| 13395   | <i>Dlx5</i>    | 2.24        | 2.01   |
| 18612   | <i>Etv4</i>    | 2.09        | 2.78   |
| 14247   | <i>Fli1</i>    | 1.88        | 8.50   |
| 57441   | <i>Gmnn</i>    | 1.52        | 1.94   |
| 56198   | <i>Heyl</i>    | 1.51        | 5.53   |
| 16909   | <i>Lmo2</i>    | 1.82        | 5.93   |
| 94352   | <i>Loxl2</i>   | 3.78        | 6.77   |
| 17095   | <i>Lyl1</i>    | 3.20        | 3.52   |
| 17865   | <i>Mybl2</i>   | 1.91        | 2.29   |
| 18102   | <i>Nme1</i>    | 1.87        | 2.71   |
| 231602  | <i>P2rx2</i>   | 4.88        | 3.82   |
| 18511   | <i>Pax9</i>    | 1.86        | 5.14   |
| 59093   | <i>Pcbp3</i>   | 2.17        | 2.55   |
| 18740   | <i>Pitx1</i>   | 9.05        | 6.34   |
| 320795  | <i>Pkn1</i>    | 6.70        | 3.26   |
| 18751   | <i>Prkcb</i>   | 2.45        | 4.01   |
| 18933   | <i>Prrx1</i>   | 3.15        | 8.29   |
| 19663   | <i>Rbpms</i>   | 4.09        | 5.88   |
| 104383  | <i>Rcor2</i>   | 2.09        | 1.80   |
| 20666   | <i>Sox11</i>   | 13.68       | 6.10   |
| 22160   | <i>Twist1</i>  | 3.59        | 7.06   |
| 13345   | <i>Twist2</i>  | 14.06       | 6.35   |
| 21417   | <i>Zeb1</i>    | 5.08        | 4.42   |

**Supplementary Table 1. Relative expression level of transcription (co)factors upregulated in epidermal cells at E13.5 and the wound edge.** The table shows the log<sub>2</sub>-fold change of the transcription factors and co-factors that are upregulated in epidermal cells at E13.5 (versus P4) and at the wound edge (WdEpi, versus unwounded). \*, data from Ge *et al.* (2017)<sup>1</sup>.

## Supplementary Table 2

|                                                                                                                                                                                                                                                                                                                                                                                                             |
|-------------------------------------------------------------------------------------------------------------------------------------------------------------------------------------------------------------------------------------------------------------------------------------------------------------------------------------------------------------------------------------------------------------|
| Cornified envelope genes increased in dcKO                                                                                                                                                                                                                                                                                                                                                                  |
| <b>Lelp1</b> (4.5)                                                                                                                                                                                                                                                                                                                                                                                          |
| <i>Sprr</i> family: <b>2a2</b> (3.9), <b>2d</b> (3.2), <i>2h</i> (2.3), <i>2k</i> (1.6), <b>1b</b> (1.8), <b>1v1</b> (2.6)                                                                                                                                                                                                                                                                                  |
| <i>Lce</i> family: <i>1a1</i> (4.7), <b>1b</b> (24.7), <i>1a2</i> (9.4), <i>1c</i> (13.2), <i>1d</i> (6.7), <i>1e</i> (5.5), <i>1f</i> (5.9), <i>1g</i> (8.4), <i>1h</i> (14), <i>1i</i> (8.5), <i>1j</i> (7.2), <i>1k</i> (17.5), <i>Kprp</i> (9.5), <i>1l</i> (11.1), <b>2310050C09Rik</b> (20), <i>3b</i> (1.8), <i>3c</i> (1.9), <i>3d</i> (1.9), <i>3e</i> (1.8), <i>Crct1</i> (2.2), <b>1m</b> (18.1) |
| <b>Flg2</b> (7.4), <i>Flg</i> (25.3), <i>Hrrr</i> (1.6), <b>Rptn</b> (1.8)                                                                                                                                                                                                                                                                                                                                  |

**Supplementary Table 2. The cornified envelope genes are highly induced in dcKO epidermis at E16.5.** The genes encoding cornified envelope proteins are located in the epidermal differentiation cluster (EDC) on mouse chromosome 3 (see **Fig. 7d**). The table shows the fold-changes of the differentially expressed EDC genes (FDR<0.05 and fold change>1.5, log<sub>2</sub>-fold change). The genes in bold font are bound by SOX11 and/or SOX4.

**Supplementary Table 3**

| Gene ID | Gene Symbol     | E13.5 vs P4 | WdEpi* | dcKO E16.5 epi | dcKO keratinocytes | Cell Organization /Movement |
|---------|-----------------|-------------|--------|----------------|--------------------|-----------------------------|
| 16800   | <i>Arhgef2</i>  | 2.31        | 1.81   | -1.80          | -2.13              | Y                           |
| 18612   | <i>ETV4</i>     | 2.09        | 2.78   | -1.65          | -6.13              | Y                           |
| 14026   | <i>Evl</i>      | 2.20        | 3.82   | -2.11          | -12.20             | Y                           |
| 223254  | <i>Farp1</i>    | 1.63        | 2.11   | -1.64          | -4.20              | Y                           |
| 74202   | <i>Fblim1</i>   | 5.22        | 8.25   | -2.12          | -7.25              | Y                           |
| 14086   | <i>Fscn1</i>    | 2.53        | 6.20   | -1.84          | -7.94              | Y                           |
| 381633  | <i>Gm1673</i>   | 15.49       | 3.80   | -1.77          | -2.29              | N                           |
| 14702   | <i>Gng2</i>     | 4.33        | 5.27   | -1.56          | -8.77              | N                           |
| 224023  | <i>Klhl22</i>   | 4.60        | 4.20   | -1.80          | -12.05             | Y                           |
| 16852   | <i>Lgals1</i>   | 4.21        | 7.70   | -2.18          | -76.92             | Y                           |
| 67803   | <i>Limd2</i>    | 5.36        | 3.02   | -2.51          | -3.48              | N                           |
| 17357   | <i>Marcks1</i>  | 5.52        | 1.96   | -2.26          | -5.99              | N                           |
| 18542   | <i>Pcolce</i>   | 11.40       | 2.08   | -3.32          | -2.06              | N                           |
| 69675   | <i>Pxdn</i>     | 6.70        | 1.71   | -1.66          | -41.67             | Y                           |
| 104383  | <i>Rcor2</i>    | 2.09        | 1.80   | -1.85          | -3.09              | N                           |
| 26564   | <i>Ror2</i>     | 3.71        | 3.74   | -1.55          | -8.20              | Y                           |
| 109232  | <i>Sccpdh</i>   | 2.24        | 1.72   | -1.83          | -2.30              | N                           |
| 20317   | <i>Serpinf1</i> | 10.11       | 7.25   | -2.08          | -2.12              | Y                           |
| 218756  | <i>Slc4a7</i>   | 2.29        | 1.72   | -1.66          | -2.46              | N                           |
| 20621   | <i>Snn</i>      | 3.55        | 2.66   | -1.82          | -2.56              | N                           |
| 68875   | <i>Tmcc2</i>    | 2.18        | 2.11   | -1.60          | -1.52              | N                           |
| 230157  | <i>Tmeff1</i>   | 4.32        | 1.68   | -1.72          | -1.72              | N                           |
| 19240   | <i>Tmsb10</i>   | 2.75        | 3.46   | -2.45          | -2.78              | Y                           |
| 13345   | <i>Twist2</i>   | 14.06       | 6.35   | -2.98          | -7.14              | N                           |
| 13003   | <i>Vcan</i>     | 4.62        | 3.33   | -2.93          | -15.63             | Y                           |
| 100072  | <i>Camta1</i>   | -5.92       | -2.43  | 1.57           | 2.64               | N                           |
| 71884   | <i>Chit1</i>    | -13.89      | -1.52  | 1.59           | 1.53               | N                           |
| 19419   | <i>Rasgrp1</i>  | -9.35       | -3.52  | 1.54           | 7.49               | Y                           |
| 108116  | <i>Slco3a1</i>  | -6.62       | -1.96  | 1.55           | 2.69               | N                           |

**Supplementary Table 3. Relative expression level of genes up- or down-regulated in epidermal cells at E13.5 and the wound edge directly regulated by SOX11 and SOX4.** The table shows the log<sub>2</sub>-fold of the differentially expressed genes that show direct binding to SOX11 and/or SOX4 and are overlapped between specified transcriptomes: epidermal development (E13.5 vs P4), E16.5 epidermis (dcKO E16.5 epi) or primary keratinocytes (dcKO keratinocytes), and wound edge (WdEpi). Genes are categorized as functionally involved in the biological processes related to cell organization/movement (Y) or not (N). \*, data from Ge *et al.* (2017)<sup>1</sup>.

## Supplementary Table 4

### Supplementary Table 4. Sequences of oligos

#### Primers for Cloning

|                           |                                        |              |                                      |
|---------------------------|----------------------------------------|--------------|--------------------------------------|
| <i>Sox11_F_XhoI</i>       | gac c tcgagc ATGGTGCAGCAGGCCGAGAGCTC   | To pcDNA3.1  |                                      |
| <i>Sox11_R_SfuI</i>       | aga ttcgaa ATACGTGAACACCAGGTCGGAGA     |              |                                      |
| <i>Sox4_F_XhoI</i>        | gac c tcgagc ATGGTACAACAGACCAACAACG    | To pcDNA3.1  |                                      |
| <i>Sox4_R_ApaI</i>        | ata gggccc GCGTAGGTGAAGACCAGGTTAGAGATG |              |                                      |
| <i>Sox4_F_HindIII</i>     | gac aagctt ACC ATGGTACAACAGACCAACAACG  | To pENTR 1A  |                                      |
| <i>Sox4_R_EcoRV</i>       | ata gatatc GTAGGTGAAGACCAGGTTAGAGATG   |              |                                      |
| <i>Fscn1_F_HindIII</i>    | gac aagctt ACC ATGACCGCCAACGGCACGGC    | To pcDNA3.1  |                                      |
| <i>Fscn1_R_EcoRV</i>      | ata gatatc GACTCCAGAGTGAGGCGGGGTC      |              |                                      |
| <i>Tead2_enh_Sall_F</i>   | tta gtcgac TTCTATCTGGGAGTCTACTCCCTTC   | To pGL3-TATA | chr7: 52470841-52472571,<br>1731 bp  |
| <i>Tead2_enh_Sall_R</i>   | tta gtcgac AAGATCAGCAGCTACATATGGTATTGC |              |                                      |
| <i>Fscn1_enh_BamHI_F</i>  | ata ggatcc CAGGATCGGGGTAGTAGATTATAAAG  | To pGL3-TATA | chr5:143724688-143726687,<br>2000 bp |
| <i>Fscn1_enh_BamHI_R</i>  | ata ggatcc ACCATCAAGTGGAGGCCAGAAG      |              |                                      |
| <i>Fblim1_enh1_XhoI_F</i> | ata ctcgag GGAGGGCAAATCAGACCCAG        | To pGL3-TATA | chr4:141154621-141156000,<br>1380 bp |
| <i>Fblim1_enh1_XhoI_R</i> | tct ctcgag GGTGCACCGTGGGGTGGGCAG       |              |                                      |
| <i>Fblim1_enh2_XhoI_F</i> | ata ctcgag CTTTATATCCGTTCCAGACGGG      | To pGL3-TATA | chr4:141130909-141131511,<br>603bp   |
| <i>Fblim1_enh2_XhoI_R</i> | tct ctcgag GCGTTCAGCCGCTAGGGGGC        |              |                                      |
| <i>Marcks1_enh_XhoI_F</i> | ata ctcgag GCTCCCCGGGGCGACGTGACC       | To pGL3-TATA | chr4:129191095-129191672,<br>578bp   |
| <i>Marcks1_enh_XhoI_R</i> | tct ctcgag AGCACTACTGGGCGGGAAGCAG      |              |                                      |
| <i>Pxdn_enh_BamHI_F</i>   | ata ggatcc ACCACCGTGCCTGCATGCATCTG     | To pGL3-TATA | chr12:30623122-30623658,<br>537bp    |
| <i>Pxdn_enh_BamHI_R</i>   | ata ggatcc TGATGTGGGGTGGGCATCCTTCC     |              |                                      |

#### Primers for real-time PCR

|               | Forward                     | Reverse                |
|---------------|-----------------------------|------------------------|
| <i>Mrpl19</i> | AGAGGCAGGAGGGTTCCAAG        | GGGCTTCATGAGACCACGAC   |
| <i>Hprt</i>   | CAGGCCAGACTTTGTTGGATT       | TTGCGCTCATCTTAGGCTTT   |
| <i>Sox4</i>   | GATGCGTTTTGGCATTGTGT        | TCTCCAGCTGCAAGGACAAG   |
| <i>Sox11</i>  | TTGGTGTCTCAGCATCCAACCAG     | AGCCTGCCCTAAGCATCACTTC |
| <i>Sox12</i>  | TCAGTTCTTCCCTCGGCGCATTC     | ACATTCACTGGACAAGGCAACG |
| <i>Krt1</i>   | GGACATGGAGATTGCCACA         | CTACTGCTTCCGCTCATGCT   |
| <i>Krt5</i>   | ATGAACCGAATGATCCAGAGG       | AATGGCGTTCTGGAGGTTG    |
| <i>Dsg1a</i>  | AAGGGGATCCTGATGAAACC        | CACGTGTGAATTGCTCCATC   |
| <i>Casp14</i> | CCAACCTATACGGATACCCTCC      | AGTCGGGTGATCTCTTCTGTC  |
| <i>Cdsn</i>   | CTGATGGCCGGTCTTATTCT        | GCTGTTGGAGCCAGTCTTTC   |
| <i>Ivl</i>    | CCTGTGAGTTTGGTTGGTCTACA     | GGATGTGGAGTTGGTTGCTT   |
| <i>Tincr</i>  | TGCCTGACCATCAGACAGTTC       | TCCTTCAGCCAGCATCTTGT   |
| <i>Flg</i>    | GCAAGTGGTCAGGGAGGATAT       | GGAACGATATACCTGGAGATGC |
| <i>Lor</i>    | TCACTCATCTTCCCTGGTGCTT      | GTCTTTCCACAACCCACAGGA  |
| <i>Lce1a</i>  | CACTTTAGACAAACCATTTCAGGAGAA | CCAAGAAGACAAACCCAGCAA  |
| <i>Fblim1</i> | TCTGCGAGAATCCCATCATC        | CGGTAGGTTCCACAGACAGG   |
| <i>Fscn1</i>  | GGCGCCTACAACATCAAAGAC       | CCACCTTGAGAGCCACCTT    |

#### Primers for genotyping

|                         | Forward             | Reverse                | Product size |
|-------------------------|---------------------|------------------------|--------------|
| <i>TRE-Sox11-3×FLAG</i> | AGGACCTGGATTCTTCAGC | AACTCACTTGCATCGTCATCCT | 212 bp       |

Primers for ChIP-qPCR

|                             | <b>Forward</b>          | <b>Reverse</b>             |
|-----------------------------|-------------------------|----------------------------|
| <i>Tead2</i>                | ATGCCTGGGCTCTTTGTTCT    | TGGGTGCCCATCAAACCTC        |
| <i>Tead2</i> _negative site | CAACTTGTGGTGCATTCTGG    | CAGTCAAACCTCCCTGCTTCTG     |
| <i>Tubb3</i>                | GGCCTGGGTTCTATTGTCC     | CCCTCGCTGGCTGATGTAAG       |
| <i>Tubb3</i> _negative site | TCAGCCTTGGTGACATAGGAA   | GCTGGACGCCAAGTCTCTAC       |
| <i>Ivl</i>                  | GGAAACCATGACTAAGCCTCTG  | ACAAGAATGGTGTGTCAGTCAACAAC |
| <i>2310050C09Rik</i>        | AGTCACGTGTGACGCTCCA     | GGCAGGTCCAGAAATCCAG        |
| <i>Sprr2d</i>               | CCCAGATGCAGAACAGATGACT  | GGCAGGTCCAGAAATCCAG        |
| <i>Flg2</i>                 | TTGGTAAATGTAAGGGTGTGGTC | GCCTGGGTTAGAAATCTCTTGTG    |
| <i>S100a10</i>              | CCAGGAAAGCCAGACACATT    | CCACACCCAAGGTCTCACA        |
| <i>EDC</i> _Negative site 1 | GAAGGACAGGCAAGAAAGAGGT  | CGCAGCTCTTTCAAGTGGTAATCT   |
| <i>EDC</i> _Negative site 2 | ACAAGAGCATGGCCTGTACCA   | TACCCAGCTCCTTCTACTGCTTTC   |
| <i>EDC</i> _Negative site 3 | CCAAAGCTCCTATGCTTCCA    | GTTCCACTGTTGGCTTTGCT       |
| <i>Fscn1</i>                | GCCTTGGTGGCCTCTTTATT    | CCAACCTTCAACCTCCCAGT       |
| <i>Fblim1</i>               | GGAGGGCAAATCAGACACC     | TCAGCCTCCTTCCTTCTCT        |
| <i>Smad3</i>                | TTGTGGAGAAGGGCCAAA      | CGGCTCTCTCTAACCACCT        |
| <i>Lfng</i>                 | AGGCCAGCTGTATGAAATG     | CAGACAAAGGGACCCGAAG        |
| <i>Tmsb10</i>               | ACCCAGCCGAGGTAAGTTG     | CCCAGCAGGAGATTCCATT        |
| <i>Lgals1</i>               | GGCCAGGTTGCGAGATTTAG    | CGACTAGACCCAGCGAGGAA       |
| <i>Pxdn</i>                 | GGTACTGGTTTGGAGAGGTG    | CGGGAGATTCCGAGTTTGA        |
| <i>Tes</i>                  | CACTCCTCTTGGCCTGCTT     | CTTGCACCCACTGGACTTCT       |
| <i>Nfe2l2</i>               | CACAAGTCTGTTAACCCAAAGCA | GGTGTAAAGTCATGCGCCAGT      |
| Negative_1                  | CACAGTTCAGGGTTCCAGT     | CTGCTCCTCACTGTCTGCT        |
| Negative_2                  | GGAGGCTGGCAGAGCAGTC     | AGCCCTTACAGTCCCTCCTA       |
| Negative_3                  | CAAACAGCTAAGCCCAGGAA    | GCAGCAGCAGCACAGAAA         |
| Negative_4                  | TAGCTGGAAAGCCCAATCA     | ATCCATGCTCCCTTCTTGA        |

Oligos for gRNA cloning

|                         | <b>Forward</b>             | <b>Reverse</b>              |
|-------------------------|----------------------------|-----------------------------|
| <i>Fscn1</i> , pair 1   | caccg GTAGACCGCGACGTGCCTTG | aaac CAAGGCACGTGCGGTCTAC c  |
| <i>Fscn1</i> , pair 2   | caccg TCGAGCGCGAGGTGCCGA   | aaac TCGGGCACCTGCGCTCGCA c  |
| <i>Fscn1</i> , pair 3   | caccg GCTACGCGCATCTGAGCGCG | aaac CGCGCTCAGATGCGCGTAGC c |
| <i>Fblim1</i> , pair 1  | caccg AGGAGCCTCCTGTCTTACCA | aaac TGGTAAGACAGGAGGCTCCT c |
| <i>Fblim1</i> , pair 2  | caccg GAGGCATTGGTCTTGCCAGA | aaac TCTGGCAAGACCAATGCCTC c |
| <i>Fblim1</i> , pair 3  | caccg TTTGTGGGAAGCATCTCCA  | aaac TGGGAGATGCTTCCACAAA c  |
| <i>Control</i> , pair 1 | caccg GCACTACCAGAGCTAACTCA | aaac TGAGTTAGCTCTGGTAGTGC c |
| <i>Control</i> , pair 2 | caccg GTCTCCACGCGCAGTACATT | aaac AATGTACTGCGGTGGAGAC c  |

## SUPPLEMENTARY REFERENCES

1. Ge, Y. *et al.* Stem cell lineage infidelity drives wound repair and cancer. *Cell* **169**, 636-650 e614 (2017).
